# Supplementary material
Source: publisher site journal article supplement (https://cdn.jamanetwork.com/ama/content_public/journal/psych/24834/yoa110068_supp.pdf)
Supplement: Supplementary file 1 [file yoa110068_supp.pdf]

## Supplementary Online Content

Schulz KP, Fan J, Bédard A-CV, Clerkin SM, Ivanov I, Tang CY, Halperin JM, Newcorn JH. Common and unique therapeutic mechanisms of stimulant and nonstimulant treatments for attention-deficit/hyperactivity disorder. *Arch Gen Psychiatry*. doi: 10.1001/archgenpsychiatry.2011.2053.

**eTable 1.** Baseline Neural Activations for Response Inhibition in 36 Youth With ADHD

**eTable 2.** Greater Baseline Neural Activations for Response Inhibition in Youth With ADHD Treated With Methylphenidate (n = 18) Than in Those Treated With Atomoxetine (n = 18)

**eFigure.** Mean (SD) parameter estimates for baseline signal change in the right precuneus of 36 youth with ADHD plotted separately for go and no-go events.

This supplementary material has been provided by the authors to give readers additional information about their work.

**eTable 1. Baseline Neural Activations for Response Inhibition in 36 Youth With ADHD**

| Brain Region                        | Brodmann Area | Voxel Coordinates <sup>a</sup> |     |    | Volume <sup>b</sup> | T score | P Value |
|-------------------------------------|---------------|--------------------------------|-----|----|---------------------|---------|---------|
|                                     |               | x                              | y   | z  |                     |         |         |
| Right inferior frontal gyrus        | 45/47         | 40                             | 22  | -6 | 1,293               | 6.47    | < .001  |
| Left inferior frontal gyrus         | 45/47         | -40                            | 18  | -4 | 1,108               | 5.16    | < .001  |
| Right middle frontal gyrus          | 9/46          | 38                             | 36  | 40 | 871                 | 4.30    | < .001  |
| Bilateral anterior cingulate cortex | 32            | 6                              | 36  | 32 | 1,967               | 5.67    | < .001  |
| Right inferior parietal lobule      | 40            | 52                             | -42 | 36 | 1,930               | 7.07    | < .001  |
| Left inferior parietal lobule       | 40            | -56                            | -50 | 30 | 938                 | 6.63    | < .001  |
| Right precuneus                     | 7             | 4                              | -66 | 42 | 190                 | 3.70    | < .001  |
| Right caudate nucleus               | ---           | 14                             | 6   | 12 | 206                 | 5.01    | < .001  |
| Left caudate nucleus                | ---           | -12                            | 6   | 12 | 253                 | 5.36    | < .001  |

<sup>a</sup> Coordinates of peak activation based on the Montreal Neurological Institute stereotactic coordinate system.

<sup>b</sup> No. of voxels. One voxel = 8 mm<sup>3</sup>.

**eTable 2. Greater Baseline Neural Activations for Response Inhibition in Youth With ADHD Treated With Methylphenidate (n = 18) Than [in](#) Those Treated With Atomoxetine (n = 18)**

| Brain Region                  | Brodmann Area | Voxel Coordinates <sup>a</sup> |     |    | Volume <sup>b</sup> | T score | P Value |
|-------------------------------|---------------|--------------------------------|-----|----|---------------------|---------|---------|
|                               |               | x                              | y   | z  |                     |         |         |
| Left superior parietal lobule | 7             | -30                            | -44 | 40 | 167                 | 4.82    | < .001  |
| Left paracentral lobule       | 5             | -8                             | -42 | 60 | 147                 | 4.32    | < .001  |

<sup>a</sup>Coordinates of peak activation based on the Montreal Neurological Institute stereotactic coordinate system.

<sup>b</sup>No. of voxels. One voxel = 8 mm<sup>3</sup>.

eFigure.

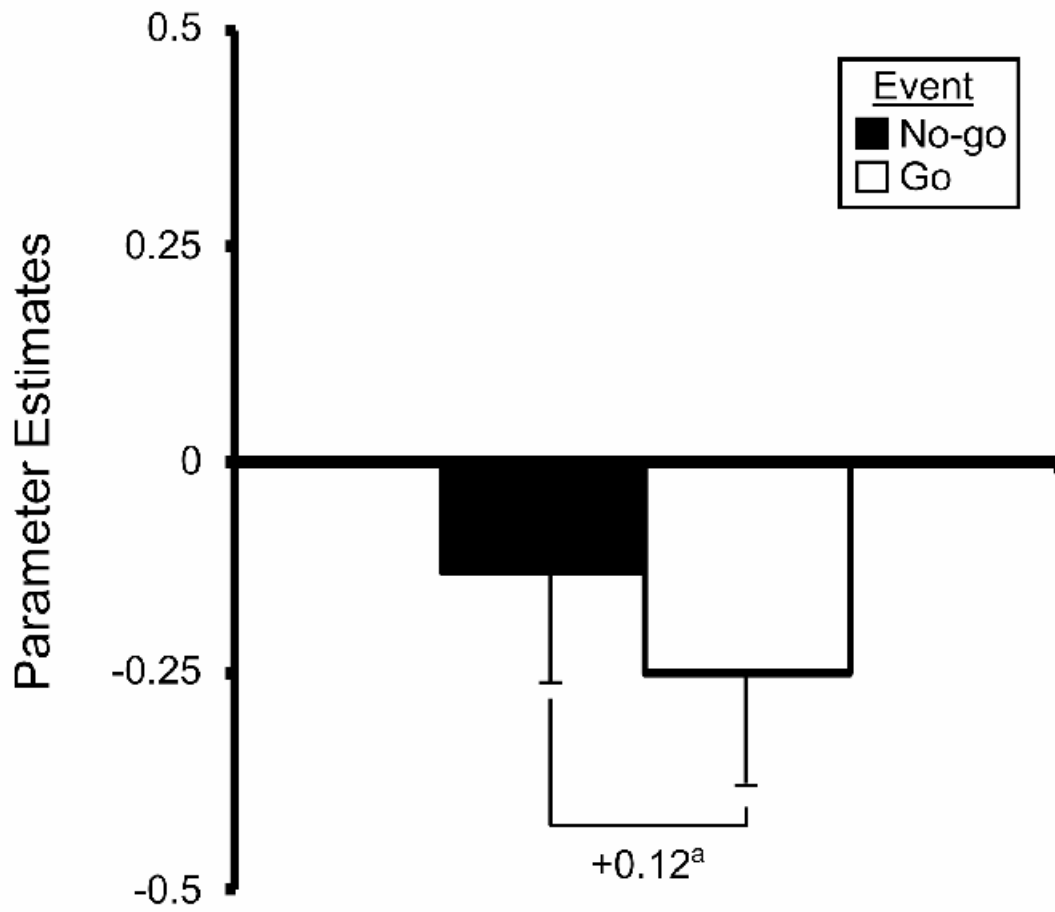

<sup>a</sup>The no-go event minus go event contrast confusingly identified task-related activation for this precuneus region.
